# Supplementary material for: Effect of tailored use of tirofiban in patients with Non-ST-elevation acute coronary syndrome undergoing percutaneous coronary intervention: a randomized controlled trial
Source: Springer Nature journal article supplement (doi:10.1186/s12872-018-0938-6), 2018-10-22

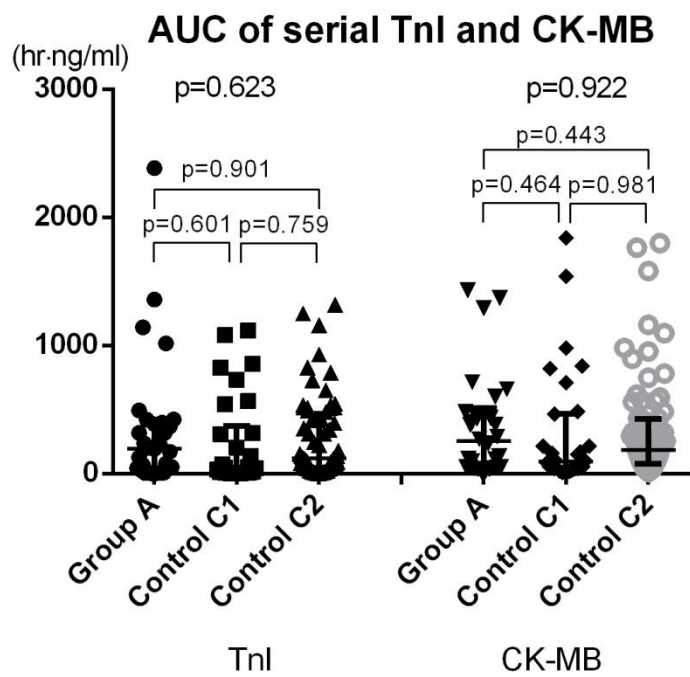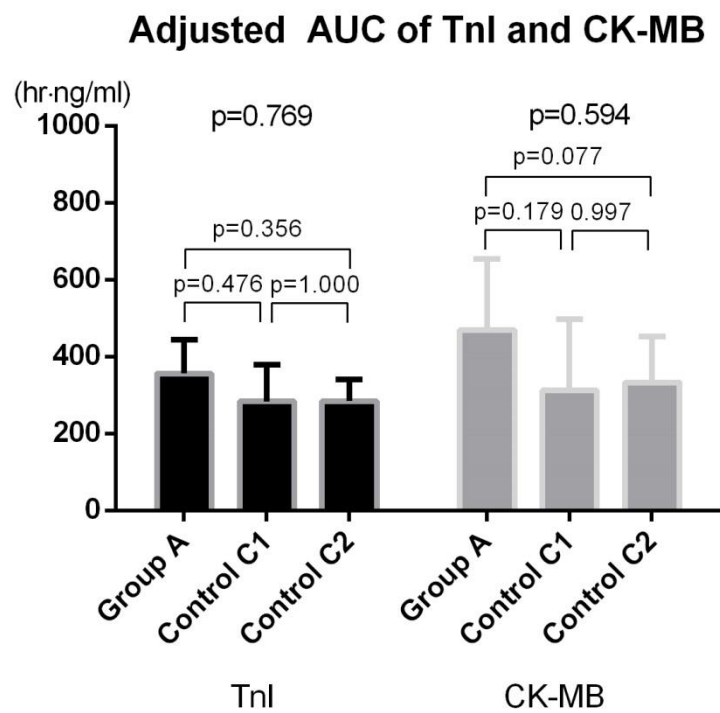

Supplement: MOESM1 [file 16217240]
